# Supplementary material for: 3D X-ray Microscopy as a Tool for in Depth Analysis of the Interfacial Interaction between a Single Carbon Fiber and an Epoxy Matrix after Mechanical Loading
Source: MDPI journal article supplement (doi:10.3390/jcs5050121), 2021-05-04
Supplement: s1 [file s1]

Archive with 1 entries (1 files):
- jcs-1188772-supplementary.pdf
